# Supplementary material for: In-Situ SERS Detection of Hg2+/Cd2+ and Congo Red Adsorption Using Spiral CNTs/Brass Nails
Source: MDPI journal article supplement (doi:10.3390/nano12213778), 2022-10-26
Supplement: s1 [file s1]

# In-Situ SERS Detection of $\text{Hg}^{2+}/\text{Cd}^{2+}$ and Congo Red Adsorption Using Spiral CNTs/Brass Nails

Mohamed Shaban

Department of Physics, Faculty of Science, Islamic University of Madinah, Madinah 42351, Saudi Arabia;  
mssfadel@aucegypt.edu

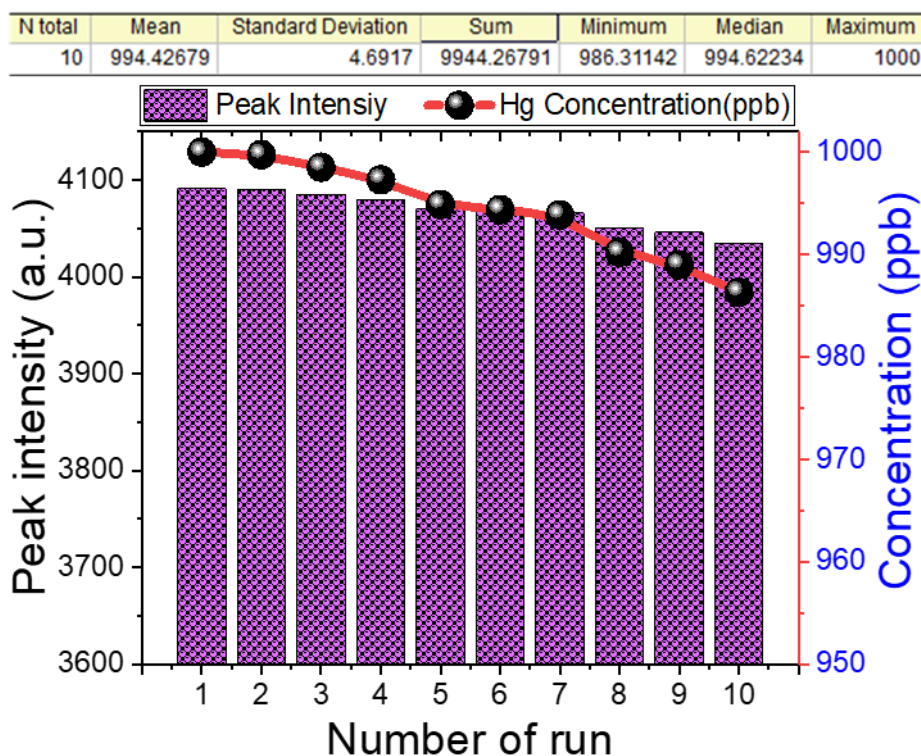

**Figure S1.** Reusability test of the of SERS sensor for ten cycles provided with a table for the descriptive statistics of the results. After each cycle, the SERS sensor is cleaned by rinsing with deionized (DI) water and drying with nitrogen.
